# Supplementary material for: BRCA1 negatively regulates IGF-1 expression through an estrogen-responsive element-like site
Source: PubMed Central journal article supplement — Cell Death Dis. 2012 Jun 28;3(6):e336–. doi: 10.1038/cddis.2012.78 (PMC3388245; doi:10.1038/cddis.2012.78), 2012-06-28
Supplement: cddis201278x1.pdf [file cddis201278x1.pdf]

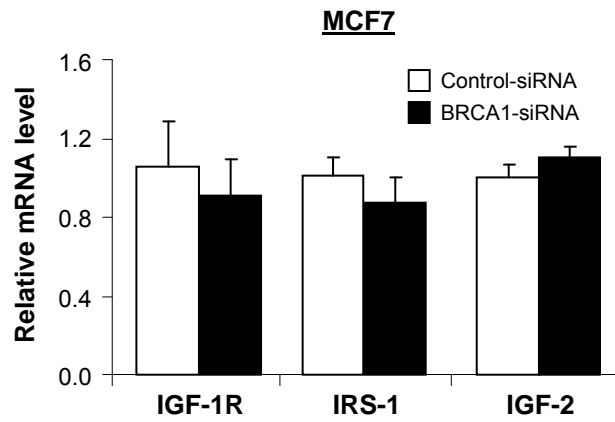

**Supplementary Figure S1** Quantitative RT-PCR analysis of IGF-1R, IRS-1 and IGF-2 expression in BRCA1-KD MCF7 cells. Representative data from two independent experiments performed in triplicate are shown as mean  $\pm$  SEM.

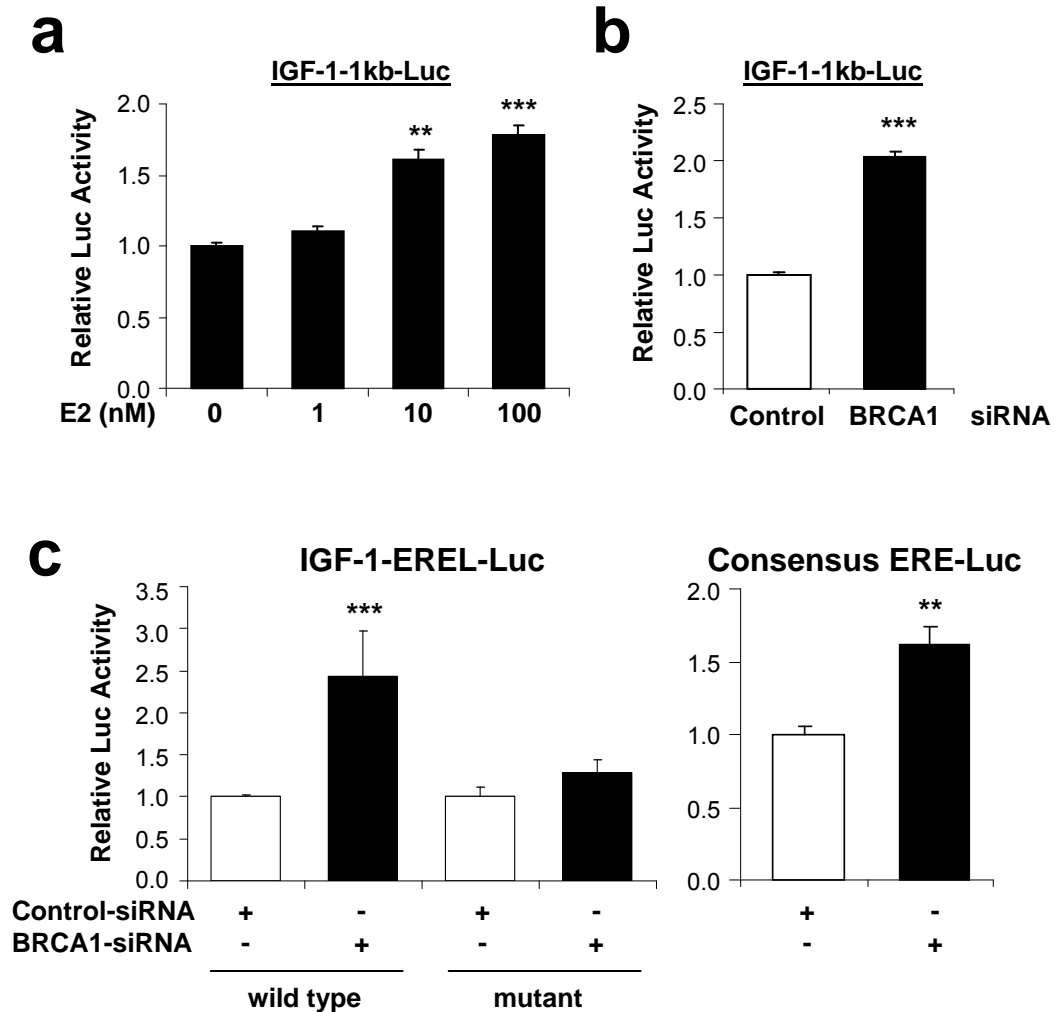

**Supplementary Figure S2** Regulation of IGF-1 promoter reporter activity by BRCA1. (a) E2 induced expression of the reporter gene containing 1 kb of the promoter region of human IGF-1 gene (IGF-1-1 kb-Luc) in a dose-dependent manner. (b) BRCA1-KD induced reporter gene expression from human IGF-1 promoter reporter (IGF-1-1 kb-Luc) in MCF7 cells. (c) BRCA1-KD induced wild type IGF-1-EREL-Luc or consensus ERE-Luc, but not mutant IGF-1-EREL-Luc activity in MCF7 cells under normal growth condition. \*\* $P < 0.01$ ; \*\*\* $P < 0.001$ . Representative data from two independent experiments are shown as mean  $\pm$  SEM. \*\* $P < 0.01$ ; \*\*\* $P < 0.001$ .

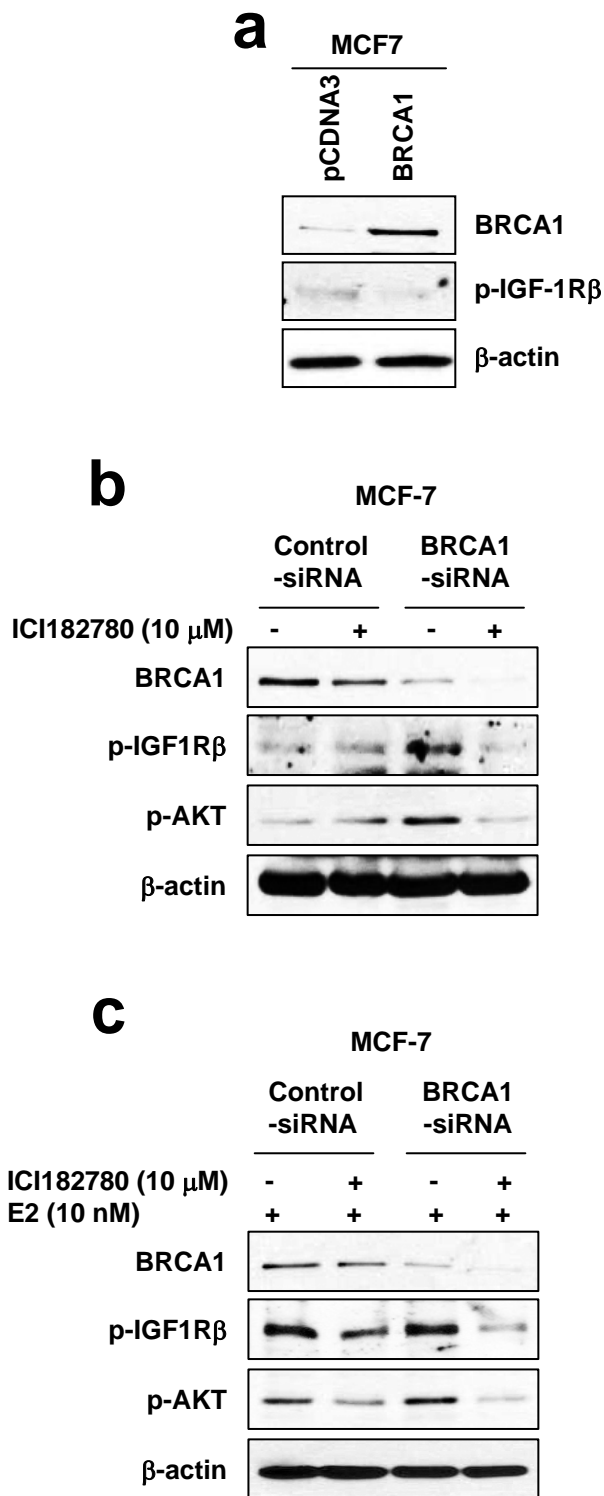

**Supplementary Figure S3** Regulation of IGF1-Rβ phosphorylation by BRCA1. (a) Overexpression of BRCA1 further reduced phospho-IGF-1Rβ in MCF7 cells. MCF7 cells treated with expression DNA (control vs. BRCA1) were subject to western blot analysis. The siRNA-transfected MCF7 cells either under normal growth conditions (b) or E2-stimulated conditions (c) were treated with 10 μM ICI172780 for 24 h followed and analyzed by western blot analysis with indicated antibodies. β-actin was used as a loading control.

**Supplementary Table S1 Protein kinase inhibitors and their known biochemical IC<sub>50</sub> (nM) used in this study.**

| Inhibitor   | Known targets (IC <sub>50</sub> )                                                          | Reference |
|-------------|--------------------------------------------------------------------------------------------|-----------|
| OSI-906     | IGF-1R (35), IR (75)                                                                       | 1         |
| AG 1024     | IGF-1R (18,000), IR (80,000)                                                               | 2         |
| BMS-536924  | IGF-1R (100), IR (73), FAK (150), LCK (341), MEK (182)                                     | 3         |
| BMS-754807  | IGF-1R (1.8), IR (1.7), MET (5.6), AURKA (9), AURKB (25), TrkA (7.4), TrkB (4.1), RON (44) | 4         |
| GSK1904529A | IGF-1R (27), IR (25)                                                                       | 5         |
| BEZ235      | PI3K $\alpha$ (4), PI3K $\beta$ (75), PI3K $\delta$ (7), PI3K $\gamma$ (5), mTOR (20.7)    | 6         |

**References for Supplementary Table S1**

1. Buck E, Gokhale PC, Koujak S, Brown E, Eyzaquirre A, Tao N *et al.* Compensatory insulin receptor (IR) activation on inhibition of insulin-like growth factor-1 receptor (IGF-1R): rationale for cotargeting IGF-1R and IR in cancer. *Mol Cancer Ther* 2010; **9**: 2652–2664.
2. Párrizas M, Gazit A, Levitzki A, Wertheimer E, LeRoith D. Specific inhibition of insulin-like growth factor-1 and insulin receptor tyrosine kinase activity and biological function by tyrphostins. *Endocrinology* 1997; **138**: 1427–1433.
3. Wittman M, Carboni J, Attar R, Balasubramanian B, Balimane P, Brassil P *et al.* Discovery of a 1*H*-benzimidazol-2-yl)-1*H*-pyridin-2-one (BMS-536924) inhibitor of insulin-like growth factor I receptor kinase with in vivo antitumor activity. *J Med Chem* 2005; **48**: 5639–5643.
4. Carboni JM, Wittman M, Yang Z, Lee F, Greer A, Hurlburt W *et al.* BMS-754807, a small molecule inhibitor of insulin-like growth factor-1R/IR. *Mol Cancer Ther* 2009; **8**: 3341–3349.
5. Sabbatini P, Rowand JL, Groy A, Korenchuk S, Liu Q, Atkins C *et al.* Antitumor activity of GSK1904529A, a small-molecule inhibitor of the insulin-like growth factor-I receptor tyrosine kinase. *Clin Cancer Res* 2009; **15**: 3058–67.
6. Maira S-M, Stauffer F, Brueggen J, Furet P, Schnell C, Fritsch C *et al.* Identification and characterization of NVP-BEZ235, a new orally available dual phosphatidylinositol 3-kinase/mammalian target of rapamycin inhibitor with potent in vivo antitumor activity. *Mol Cancer Ther* 2008; **7**: 1851–63.
